# Supplementary material
Source: PubMed Central journal article supplement (PMC5116712)

## Supplemental figure legends

1  
2 Supplemental Fig. 1. Hematological values of uninfected and *H. pylori*-infected gerbils.  
3 Horizontal bars represent mean  $\pm$  standard error of the mean (SEM), and asterisks  
4 represent significant differences ( $p < 0.05$ ). A). Hemoglobin values among infected and  
5 uninfected gerbils at the 11 week time point. Corresponding data at the 16 week time  
6 point are shown in the main manuscript. B). Hematocrit values (combined data from  
7 both 11 and 16 week time points) were significantly lower in infected gerbils than  
8 uninfected gerbils ( $p < 0.0001$ , Mann-Whitney U test). C). Hematocrit values of  
9 uninfected and infected gerbils (16 week time point), by diet. Hematocrit values were  
10 significantly reduced among the infected gerbils ( $40.6 \pm 1.1\%$ ) compared to the  
11 uninfected gerbils ( $49.2 \pm 0.6\%$ ,  $p < 0.0001$ ), with infected gerbils on a combination diet  
12 exhibiting the greatest reduction ( $34.9 \pm 2.3\%$ ). In a comparison of all cohorts of gerbils  
13 to the uninfected normal diet group, infected gerbils on a combination high salt/low iron  
14 diet were the only cohort with a significantly lower hematocrit level ( $p < 0.05$ , Kruskal-  
15 Wallis with Dunn's multiple comparison). D.) *H. pylori* colonization density (16 week time  
16 point), expressed as log colony forming units per gram stomach tissue. No significant  
17 differences were observed between cohorts (Kruskal-Wallis with Dunn's multiple  
18 comparison). E.) Mean Corpuscular Volume at the 11 week time point, by diet. When  
19 comparing each cohort to the reference group of uninfected gerbils on a normal diet, no  
20 significant differences were observed between cohorts (Kruskal-Wallis with Dunn's  
21 multiple comparison). Corresponding data at the 16 week time point are shown in the  
22 main manuscript. F.) Serum ferritin of gerbils, by diet at the 11 week time point. No  
23 significant differences were observed between cohorts (Kruskal-Wallis with Dunn's

24 multiple comparison). Corresponding data at the 16 week time point are shown in the  
25 main manuscript.

26

27 Supplemental Fig. 2. Gastric inflammation at the 16 week time point in *H. pylori*-infected  
28 and uninfected gerbils, scored based on histologic analysis (0-12 scale). Horizontal bars  
29 represent mean  $\pm$  standard error of the mean (SEM), and asterisks represent significant  
30 differences ( $p < 0.05$ ). A). Gastric inflammation was severe in the antrum and corpus of  
31 most *H. pylori*-infected gerbils, but no inflammation was detected in uninfected gerbils  
32 ( $p < 0.0001$ , Mann-Whitney U test). B). Serum ferritin levels were inversely correlated  
33 with total gastric inflammation scores at the 16 week time point ( $R = -0.58$ ,  $p < 0.0001$   
34 Spearman's Rank-Order Correlation). C). Hemoglobin values were inversely correlated  
35 with total gastric inflammation scores ( $R = -0.58$ ,  $p < 0.0001$  Spearman's Rank-Order  
36 Correlation). D). Gastric inflammation scores were positively correlated with gastric pH  
37 ( $R = 0.84$ ,  $p < 0.0001$  Spearman's Rank-Order Correlation).

38

39 Supplemental Fig. 3. Analysis of hemoglobin, ferritin, gastric pH, parietal cell loss and  
40 chief cell loss in *H. pylori*-infected and uninfected gerbils at the 16 week time point.  
41 Horizontal bars represent mean  $\pm$  standard error of the mean (SEM), and asterisks  
42 represent significant differences ( $p < 0.05$ ). A). Hemoglobin was inversely correlated with  
43 gastric pH ( $R = -0.64$ ,  $p < 0.0001$ ). B). Serum ferritin and gastric pH were inversely  
44 correlated ( $R = -0.63$ ,  $p < 0.0001$ ). C). Parietal cell loss was positively correlated with  
45 gastric pH ( $R = 0.91$ ,  $p < 0.0001$ ). D). Parietal cell loss was inversely correlated with  
46 hemoglobin values ( $R = -0.63$ ,  $p < 0.0001$ ). E). *H. pylori*-infected gerbils exhibited loss of

47 parietal cells ( $p < 0.0001$ , Mann-Whitney U test). F). *H. pylori*-infected gerbils exhibited  
48 loss of chief cells ( $p < 0.0001$ , Mann-Whitney U test). All associations were assessed  
49 using Spearman's Rank-Order Correlation.

50

51 Supplemental Fig. 4. Analysis of platelet counts in *H. pylori*-infected and uninfected  
52 gerbils at the 16 week time point. A). Platelet count was positively correlated with gastric  
53 pH ( $R = 0.66$ ,  $p < 0.0001$ ). B). Platelet count was inversely correlated with hemoglobin  
54 values ( $R = -0.62$ ,  $p < 0.0001$ ). C). Platelet count was inversely correlated with mean  
55 corpuscular volume ( $R = -0.46$ ,  $p < 0.0001$ ). D). Platelet count was inversely correlated  
56 with serum ferritin ( $R = -0.53$ ,  $p < 0.0001$ ). All associations were assessed using  
57 Spearman's Rank-Order Correlation.

58

S. Fig. 1

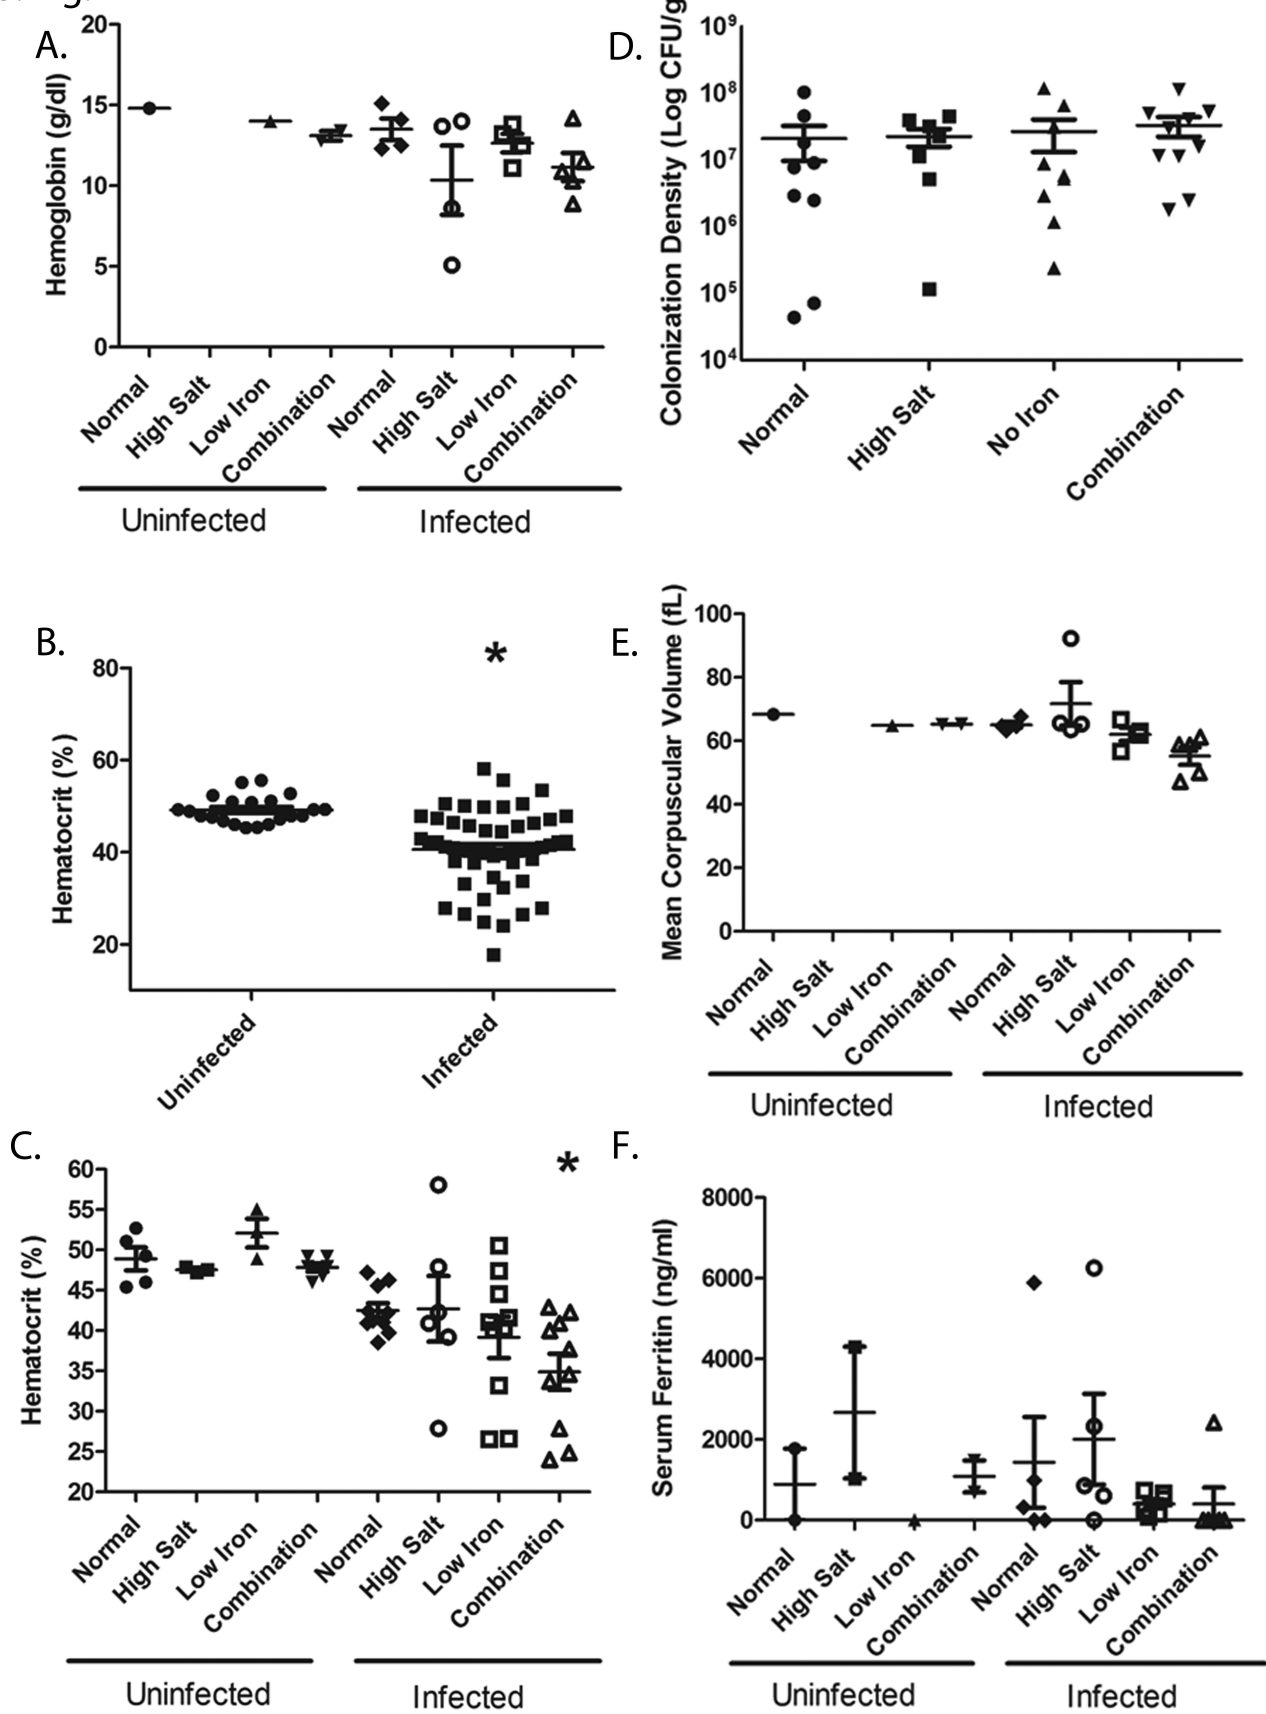

S. Fig. 2

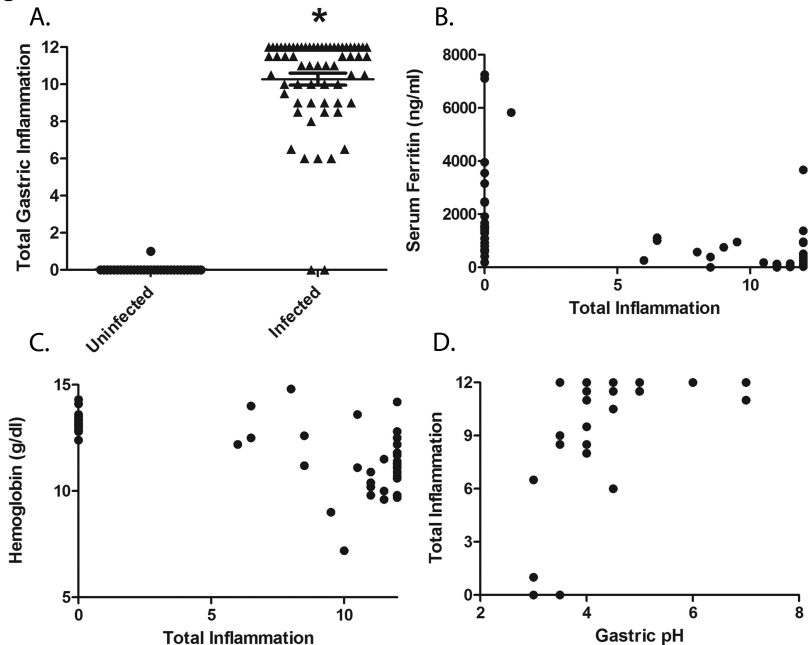

S. Fig. 3

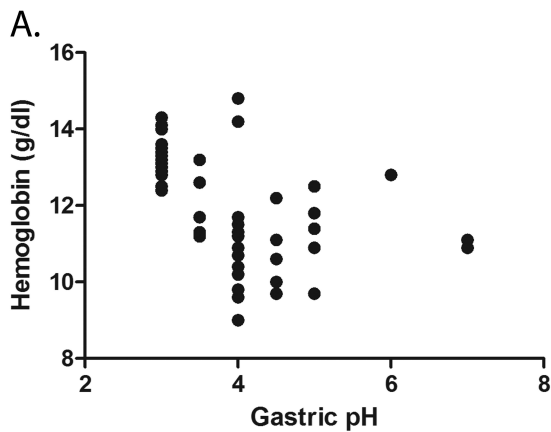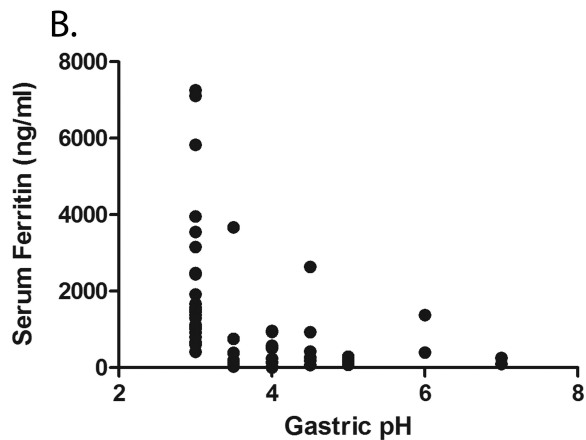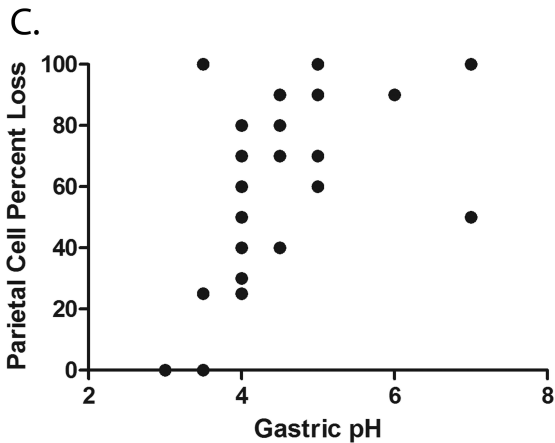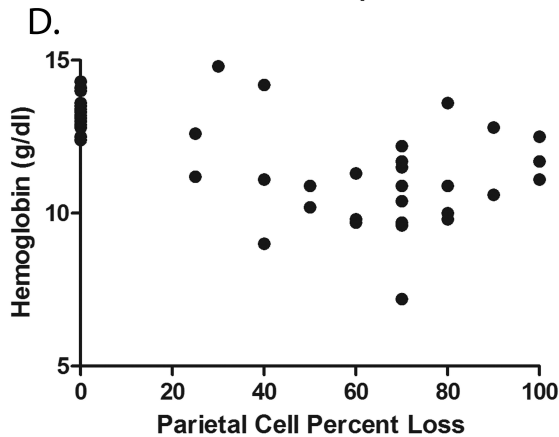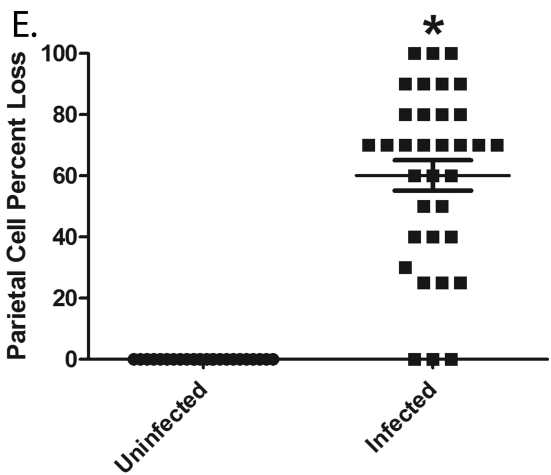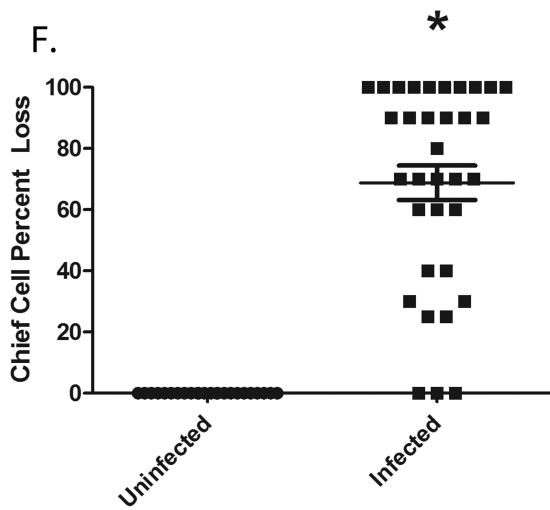

S. Fig. 4

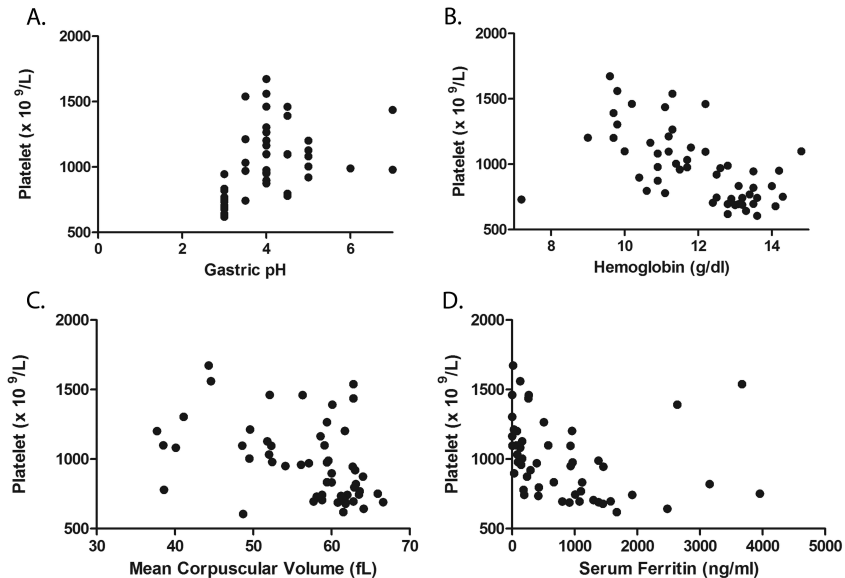

Supplement: IAI.00479-16_zii999091879so1.pdf [file IAI.00479-16_zii999091879so1.pdf]
